# Supplementary material for: Determination of carbon isotopes in carbonates (calcite, dolomite, magnesite, and siderite) by femtosecond laser ablation multi-collector ICP-MS
Source: Royal Society of Chemistry journal article supplement (doi:10.1039/d1ja00356a), 2021-12-16
Supplement: d1ja00356a1.xlsx [file d1ja00356a1.xlsx]

## Sheet: Appendix Table 1
	Appendix Table 1. Major and trace element compositions of carbonate materials.
			DOL-1(n=5)					DOL-2(n=4)					DOL-3(n=6)					DOL-6(n=6)					DOL-8 (n=5)					DOL-9 (n=15)					MGS-1 (n=5)					MGS-2 (n=10)					MGS-3 (n=20)					SD-1 (n=3)
			min	max	mean	2SD		min	max	mean	2SD		min	max	mean	2SD		min	max	mean	2SD		min	max	mean	2SD		min	max	mean	2SD		min	max	mean	2SD		min	max	mean	2SD		min	max	mean	2SD		min	max
	Mg	%	9.01908	11.4798	10.3285	2.00382		12.3695	12.5392	12.4566	0.13879		10.4366	11.1801	10.8005	0.582493		7.38747	9.10857	8.63037	1.30996		11.7337	11.9626	11.8314	0.195181		11.9766	12.4542	12.1565	0.316939		27.1531	27.533	27.436	0.319498		26.345	27.5001	27.1275	0.647315		25.9221	26.7281	26.3291	0.507394		2.42199	3.15655
	Ca	%	22.3454	22.7881	22.62	0.332655		21.772	21.995	21.8716	0.195534		22.353	22.7615	22.5053	0.324484		21.5147	22.0223	21.788	0.41013		22.6799	23.0293	22.9161	0.281077		21.6635	22.2416	21.99	0.398731		0.87411	1.44305	1.03005	0.475168		0.0776453	1.77721	0.456119	1.07955		0.101355	0.508379	0.327472	0.287726		0.029406	0.0538752
	Fe	%	0.466606	3.96822	2.20674	2.78515		0.0984316	0.118833	0.108603	0.017137		0.951453	1.53374	1.3215	0.517341		5.08843	6.4574	5.4167	1.07109		n.d.	0.0419469	0.0315333	0.0358039		0.239326	0.524768	0.342785	0.145371		0.0227104	0.0311829	0.0251786	0.00694198		0.611556	1.3418	0.937824	0.620365		1.89098	2.86355	2.36268	0.535512		41.8826	43.105
	Mn	%	0.0845682	1.38432	0.56976	1.04717		0.0226905	0.0310254	0.0266414	0.00684602		0.658772	1.07002	0.865645	0.283339		0.751411	2.53373	1.23007	1.4535		n.d.	0.00579915	0.00532801	n.d.		0.0653072	0.186989	0.117783	0.0538788		n.d.	n.d.	n.d.	n.d.		0.0725244	0.171726	0.118352	0.0873492		0.260485	0.387506	0.331424	0.0883825		0.552727	0.749106
	B	µg g-1	2.61529	3.42661	2.93026	0.676046		4.02085	4.95748	4.45828	0.768123		2.91503	4.28718	3.86007	1.04703		3.53788	7.23631	5.49077	3.0675		2.99286	3.89976	3.53958	0.760953		2.90266	5.72058	4.1363	1.52652		10.2848	11.3043	10.9023	0.953295		4.12822	5.28855	4.68483	0.721775		2.63509	8.04052	3.76568	3.17061		1.64162	3.79416
	Na	µg g-1	19.6409	87.0095	43.0693	54.7359		59.7455	81.5879	67.9368	20.5804		n.d.	4.23806	2.54729	3.4529		35.0248	330.57	105.459	223.285		n.d.	11.1545	3.01534	9.38838		n.d.	71.3815	15.6238	48.5032		109.392	139.477	119.689	23.1546		30.3392	157.946	74.2734	83.5661		n.d.	89.887	22.6778	47.2658		1.12425	585.162
	Al	µg g-1	27.364	146.62	76.9685	101.929		38.6443	57.6342	48.1737	15.8229		11.2957	120.904	51.9181	95.7389		30.6806	359.488	121.2	245.893		n.d.	9.53335	2.05505	8.38564		79.3094	320.282	157.381	135.625		7.78879	20.9348	15.0905	10.685		3.41939	37.7561	17.001	28.838		7.70686	70.2292	21.662	32.8372		1.92353	8.7565
	K	µg g-1	n.d.	4.31199	1.98585	3.85691		8.91636	17.0899	11.3418	7.70119		n.d.	0.729118	0.159528	0.587145		4.37979	22.0433	11.0057	12.1278		n.d.	2.1498	0.5132	1.8439		n.d.	13.1463	3.04541	7.63847		7.58481	17.0071	10.4624	7.50415		0.842676	17.925	9.48726	12.6771		n.d.	10.4058	3.13051	6.17698		0.24331	93.3626
	Ti	µg g-1	0.252345	1.65525	1.0293	1.04386		1.74285	4.93161	2.66969	3.02724		n.d.	1.9164	0.808215	1.76723		0	0.600624	0.220567	0.44761		n.d.	n.d.	n.d.	n.d.		n.d.	2.83229	0.785777	1.56643		n.d.	1.47451	0.496515	1.28625		n.d.	1.99012	1.07039	1.12722		n.d.	3.93486	0.948649	2.34317		n.d.	0.646288
	V	µg g-1	0.059424	22.5083	5.53935	19.0509		0.399322	0.893399	0.66621	0.409468		n.d.	2.69288	1.15288	2.55589		5.21806	7.6442	6.50449	2.16286		n.d.	0.165513	0.0485511	0.146884		0.790269	3.52437	2.34394	1.30799		0.0674485	0.181153	0.128618	0.104152		4.80661	45.0691	16.3393	26.428		0.946484	2.94341	1.7712	1.2125		0.456339	0.785697
	Cr	µg g-1	n.d.	65.7185	14.4934	57.3936		0.10548	1.30119	0.680622	0.98167		n.d.	0.742906	0.341886	0.612512		0.616484	9.1259	2.4988	6.55092		n.d.	0.761675	0.162948	0.670972		n.d.	1.55906	0.589257	0.894009		0.0402775	0.554323	0.273116	0.418302		0.683413	16.1393	7.01914	12.4837		n.d.	1.58457	0.802387	1.07488		n.d.	0.353843
	Co	µg g-1	0.0674951	1.07248	0.354418	0.872036		0.266079	0.329187	0.288923	0.0553477		0.0412263	0.121955	0.0913467	0.0584845		0.150395	0.564874	0.389078	0.272406		n.d.	0.095989	0.0542943	0.0828666		0.0621056	0.184316	0.123954	0.07117		0.0717078	0.118206	0.0960823	0.0391122		0.0302289	0.272342	0.143636	0.177201		n.d.	0.191852	0.0816992	0.109916		0.540546	3.73158
	Ni	µg g-1	0.132259	3.07279	1.14827	2.29513		0.99427	1.72676	1.22697	0.674372		0.249317	1.1428	0.66353	0.719927		1.61847	2.79585	2.22621	0.992594		0.0453326	0.297722	0.164846	0.191548		0.66565	2.19607	1.32408	0.856472		n.d.	1.00927	0.458372	0.853127		2.81863	6.00854	3.89223	2.04499		0.0984642	6.75058	3.94758	4.2638		5.97741	15.9148
	Zn	µg g-1	1.55282	26.2363	10.6056	24.8471		1.82055	2.51261	2.17065	0.571755		0.855215	2.3961	1.46115	1.1131		8.9467	20.8028	13.7396	7.89149		n.d.	1.15526	0.46306	0.899196		0.612654	2.22811	1.24008	0.962788		2.04477	3.44519	2.42539	1.15398		n.d.	1.92025	1.25765	1.04797		1.16467	3.39003	1.59623	0.974063		1.84303	9.91421
	Sr	µg g-1	53.2722	375.366	179.258	299.274		26.9852	31.122	28.8125	3.46482		36.6705	53.186	42.2348	13.0982		201.091	348.953	284.48	120.057		34.0401	36.188	35.5569	1.76411		34.8363	421.717	165.213	216.781		38.6767	59.3691	44.3913	17.1837		0.644962	109.129	15.6695	68.0304		0.00827804	2.08797	0.541234	1.09875		0.0245045	15.0898
	Y	µg g-1	5.07488	52.4566	25.3489	40.0701		0.467172	0.529334	0.498409	0.0583591		0.794563	7.76173	3.77744	6.29377		3.15167	5.75284	4.31982	2.10432		0.0636192	0.205072	0.137083	0.11342		8.12932	77.5569	37.6377	47.2322		n.d.	0.0129162	n.d.	0.0112789		3.2564	16.3029	8.36265	10.2754		1.22844	6.81969	4.46812	3.03797		0.068612	0.432351
	Ba	µg g-1	0.0792423	0.556439	0.302442	0.402229		1.51809	2.84309	2.05296	1.21846		0.100459	0.56296	0.281579	0.348849		0.295073	0.717521	0.504969	0.268163		n.d.	0.251116	0.136235	0.187313		n.d.	3.43713	0.482821	1.78744		28.0253	30.9621	29.1071	2.60847		0.0837429	5.15397	1.23505	3.05293		n.d.	1.42478	0.366047	0.838146		0.0137983	3.68275
	La	µg g-1	0.809671	3.40471	1.74474	2.10743		0.418953	0.48857	0.44176	0.0636947		0.442088	6.85905	2.88623	5.53103		1.25757	6.13763	3.21461	3.25071		0.0330035	0.0935048	0.0612672	0.0544313		0.00888662	0.122286	0.0305669	0.0636131		0.0534404	0.15578	0.0954773	0.0838743		n.d.	1.36155	0.436974	1.05153		0.00676437	0.0816946	0.0325433	0.0464642		n.d.	n.d.
	Ce	µg g-1	1.68821	5.61788	4.05969	3.00099		0.777422	0.880203	0.834685	0.100309		0.515477	13.2853	5.39121	11.0462		1.57809	7.60062	3.69291	4.15882		n.d.	0.226242	0.0994186	0.162847		0.0516022	0.761812	0.233443	0.406094		0.0686306	0.209476	0.128908	0.120309		0.0571703	3.52061	1.18488	2.64935		0.013002	0.343708	0.162168	0.212904		n.d.	n.d.
	Pr	µg g-1	0.193919	0.707374	0.551013	0.409124		0.0824531	0.0972515	0.0877786	0.0130134		0.063899	1.71871	0.699647	1.44135		0.171856	0.678576	0.384986	0.349705		n.d.	0.0060492	n.d.	0.00506205		0.0362746	0.353302	0.11442	0.179883		0.00564098	0.0199946	0.013596	0.0117723		0.0186567	0.783187	0.254809	0.55488		0.00652373	0.132193	0.0654721	0.0827455		n.d.	n.d.
	Nd	µg g-1	0.820706	3.1173	2.15001	1.65817		0.295746	0.348177	0.328858	0.0463419		0.22672	6.37599	2.63439	5.40961		0.617027	1.79106	1.18565	0.873873		n.d.	0.0452075	0.0121821	0.0393482		0.472882	2.65695	1.06264	1.23628		0.0238727	0.0587299	0.0375332	0.0312445		0.197848	3.82673	1.43814	2.656		0.0636486	0.883736	0.501573	0.575962		n.d.	0.0100229
	Sm	µg g-1	0.323396	1.90249	0.954668	1.23098		0.0724028	0.0897153	0.082229	0.0159305		0.0342333	1.1762	0.545292	1.06785		0.135566	0.302097	0.238328	0.113662		n.d.	0.0289139	0.00727815	0.0250412		0.5982	1.74429	1.14777	0.674598		n.d.	0.0152017	n.d.	0.0135968		0.208867	1.08647	0.671874	0.585983		0.0479475	0.533717	0.321909	0.332177		n.d.	0.0141867
	Eu	µg g-1	0.0174519	0.108526	0.0818146	0.0762312		0.0155535	0.0275299	0.0232951	0.0105938		0.020084	0.413065	0.173008	0.342806		0.0526392	0.214958	0.0913733	0.123589		n.d.	0.00877205	n.d.	0.00769185		0.1663	0.627264	0.437754	0.27972		n.d.	n.d.	n.d.	n.d.		0.0730999	0.30596	0.189672	0.165736		0.0356377	0.18457	0.119193	0.114499		n.d.	0.0268496
	Gd	µg g-1	0.416023	2.598	1.26421	1.80096		0.0497675	0.0739253	0.062774	0.0199771		0.0819829	1.24797	0.558333	1.02764		0.183347	0.44386	0.293585	0.224382		n.d.	0.0180458	n.d.	0.0157111		0.973968	5.22763	2.95097	2.57758		n.d.	0.0122835	n.d.	0.0134318		0.49211	2.00252	1.09594	1.05232		0.150392	0.707775	0.468298	0.387322		0.0194942	0.0388442
	Tb	µg g-1	0.0873525	0.801368	0.365688	0.605691		0.00817757	0.0119891	0.0102899	n.d.		0.0113451	0.234609	0.0995076	0.193696		0.0294601	0.0589902	0.0433954	0.0254119		n.d.	0.0144886	n.d.	0.0118831		0.163077	1.00543	0.576485	0.539012		n.d.	n.d.	n.d.	n.d.		0.0865063	0.421043	0.198077	0.283524		0.0146265	0.111676	0.0760733	0.0609376		n.d.	0.00642324
	Dy	µg g-1	0.458482	6.91164	3.05357	5.3621		0.0523993	0.0760417	0.0640669	0.0208833		0.0724886	1.37669	0.612477	1.14768		0.21668	0.416585	0.321081	0.149024		n.d.	0.02796	0.00740505	0.0234689		1.01244	7.87406	4.01623	4.45161		n.d.	0.00746172	n.d.	0.00663135		0.532102	2.71335	1.20944	1.81792		0.11283	0.670346	0.442252	0.340207		n.d.	0.0362823
	Ho	µg g-1	0.0707184	1.28258	0.577875	1.00917		0.00868298	0.0167507	0.013227	0.00708546		0.0154615	0.269781	0.120817	0.229978		0.075926	0.114293	0.0939304	0.0356509		n.d.	n.d.	n.d.	n.d.		0.198292	1.58919	0.819012	0.9735		n.d.	n.d.	n.d.	n.d.		0.109622	0.524003	0.232735	0.331981		0.0204356	0.12668	0.0958064	0.0650577		n.d.	0.0190916
	Er	µg g-1	0.204555	4.81648	2.019	3.84884		0.0278846	0.0358542	0.0317571	0.00828333		0.0223807	0.691489	0.332263	0.659601		0.192066	0.371912	0.268817	0.141075		n.d.	0.0200755	0.00510646	0.0173903		0.452525	3.7426	1.92241	2.31126		n.d.	n.d.	n.d.	n.d.		0.306636	1.40832	0.664893	0.938491		0.0800711	0.425427	0.269632	0.187494		n.d.	0.0675497
	Tm	µg g-1	0.0219643	1.03081	0.390907	0.835683		n.d.	0.00799968	n.d.	0.00519783		0.0789126	0.118431	0.0543012	0.113463		0.0378111	0.0847122	0.0527876	0.0342486		n.d.	0.0292285	0.00684693	0.0253961		0.0385405	0.349053	0.184048	0.209861		n.d.	n.d.	n.d.	n.d.		0.0377003	0.206507	0.0923482	0.131601		0.0112538	0.0589739	0.0364121	0.0258013		0.0082363	0.017019
	Yb	µg g-1	0.185522	8.69248	3.22753	7.11819		0.0195887	0.031935	0.0237203	0.0114714		0.0272208	0.703582	0.323233	0.663422		0.254814	0.525463	0.364205	0.182749		n.d.	0.0512533	0.0134879	0.044489		0.217572	1.25786	0.727542	0.730334		n.d.	0.00593716	n.d.	0.00644018		0.224953	1.19098	0.565532	0.792808		0.0565008	0.453444	0.22217	0.179172		0.0691197	0.118077
	Lu	µg g-1	0.0305168	1.32985	0.47402	1.10151		n.d.	0.0092244	0.00522507	0.00542254		0.0615232	0.112383	0.0435342	0.0967012		0.0502676	0.0877975	0.0616415	0.0290976		n.d.	0.00803939	n.d.	0.00669463		0.0289505	0.138588	0.076714	0.070962		n.d.	n.d.	n.d.	n.d.		0.0319038	0.164324	0.0813144	0.114808		0.00666557	0.0536891	0.0310418	0.024696		0.00975702	0.0146982
	notes: "n.d." represents those under detection limits.
[truncated: 18 more columns]
